1  
2  
3  
4  
5  
6  
7  
8  
9  
10  
11  
12  
13  
14  
15  
16  
17  
18  
19  
20  
21  
22  
23  
24  
25  
26  
27  
28  
29  
30  
31

Fine-scale recombination landscapes between a freshwater and marine population of threespine stickleback fish

Alice F. Shanfelter<sup>1</sup>, Sophie L. Archambeault<sup>2,3</sup>, Michael A. White<sup>1\*</sup>

<sup>1</sup>Department of Genetics, University of Georgia, Athens, GA, 30602, USA

<sup>2</sup>Institute of Ecology and Evolution, University of Bern, 3012 Bern, Switzerland

<sup>3</sup>Graduate Program in Molecular and Cellular Biology, University of Washington, Seattle, WA, 98195, USA

\*Author for Correspondence: Michael White, Department of Genetics, University of Georgia, Athens, USA, Voice: 706-542-2464, Fax: 706-542-3910, [whitem@uga.edu](mailto:whitem@uga.edu)

Data deposition: Raw sequences are deposited in NCBI's Short Read Archive, reference number SRP137809 (<https://submit.ncbi.nlm.nih.gov/subs/sra/SUB3748706/overview>).

Short title: Recombination hotspots in threespine stickleback fish

32 **Abstract**

33 Meiotic recombination is a highly conserved process that has profound effects on genome  
34 evolution. Recombination rates can vary drastically at a fine-scale across genomes and often  
35 localize to small recombination “hotspots” with highly elevated rates surrounded by regions with  
36 little recombination. Hotspot targeting to specific genomic locations is variable across species. In  
37 some mammals, hotspots have divergent landscapes between closely related species which is  
38 directed by the binding of the rapidly evolving protein, PRDM9. In many species outside of  
39 mammals, hotspots are generally conserved and tend to localize to regions with open chromatin  
40 such as transcription start sites. It remains unclear if the location of recombination hotspots  
41 diverge in taxa outside of mammals. Threespine stickleback fish (*Gasterosteus aculeatus*) are an  
42 excellent model to examine the evolution of recombination over short evolutionary timescales.  
43 Using an LD-based approach, we found recombination rates varied at a fine-scale across the  
44 genome, with many regions organized into narrow hotspots. Hotspots had divergent landscapes  
45 between stickleback populations, where only ~15% were shared, though part of this divergence  
46 could be due to demographic history. Additionally, we did not detect a strong association of  
47 PRDM9 with recombination hotspots in threespine stickleback fish. Our results suggest fine-  
48 scale recombination rates may be diverging between closely related populations of threespine  
49 stickleback fish and argue for additional molecular characterization to verify the extent of the  
50 divergence.

51

52

53 Key words: Recombination, Threespine Stickleback, Linkage-Disequilibrium, Recombination  
54 Hotspots

55

56

57

58

59

60

61

62

## 63 **Introduction**

64 Meiotic recombination is a highly-conserved process across a broad range of taxa (de  
65 Massy 2013; Petes 2001). Recombination creates new allelic combinations by breaking apart  
66 haplotypes (Coop and Przeworski 2007; Otto and Lenormand 2002), promotes the proper  
67 segregation of chromosomes during meiosis in many species (Davis and Smith 2001; Fledel-  
68 Alon et al. 2009; Kaback et al. 1992; Mather 1936), and has a pronounced impact on the  
69 evolution of genomes (Mugal et al. 2015; Webster and Hurst 2012). In many species, meiotic  
70 recombination occurs in small 1-2 kb regions called recombination “hotspots” which are  
71 surrounded by large genomic regions with little to no recombination (Barton et al. 2008; Baudat  
72 et al. 2010; Hellsten et al. 2013; Jeffreys et al. 1998; McVean et al. 2004; Myers et al. 2005;  
73 Steiner et al. 2002).

74 In most species, hotspot location is highly conserved over long evolutionary timescales  
75 (Kawakami et al. 2017; Lam and Keeney 2015; Singhal et al. 2015; Tsai et al. 2010). For  
76 example, finches share upwards of 73% of hotspots across 3 million years of evolution (Singhal  
77 et al. 2015) while species of *Saccharomyces* share 80% of hotspots over 15 million years of  
78 evolution (Lam and Keeney 2015). Evolutionarily conserved hotspots are often localized around  
79 regions of open chromatin such as transcription start sites (TSSs) and CG-rich regions (i.e. CpG  
80 islands) in vertebrates (Auton et al. 2013; Kawakami et al. 2017; Lee et al. 2004; Pan et al. 2011;  
81 Pokholok et al. 2005; Singhal et al. 2015; Tischfield and Keeney 2012). This localization pattern  
82 is thought to be due the opportunistic nature of Spo11, a meiosis specific protein which initiates  
83 recombination by creating double stranded breaks at regions of open chromatin (Celerin et al.  
84 2000; Ohta et al. 1994; Pan et al. 2011).

85 A notable exception to strong conservation of recombination hotspots has been  
86 documented in mammals, where hotspot location evolves rapidly between closely related species  
87 or even between populations (Baker et al. 2015; Brick et al. 2012; Pratto et al. 2014; Smagulova  
88 et al. 2016; Stevison et al. 2015). Contrary to the pattern observed in conserved systems, rapidly  
89 evolving hotspots typically form away from functional genomic elements and are localized by  
90 the zinc finger histone methyltransferase protein, PRDM9 (Baker et al. 2015; Baudat et al. 2010;  
91 Billings et al. 2013; Brick et al. 2012; McVean et al. 2004; Myers et al. 2005; Myers et al. 2010;  
92 Myers et al. 2008; Parvanov et al. 2010; Powers et al. 2016; Pratto et al. 2014). PRDM9 contains  
93 multiple DNA-binding zinc fingers that are under strong positive selection, leading to divergent

94 hotspot localization between closely related species (Baker et al. 2015; Billings et al. 2013; Brick  
95 et al. 2012; Myers et al. 2010; Parvanov et al. 2010). Though rapidly evolving hotspots have only  
96 been documented in some mammals, positive selection is acting on the zinc finger domain of  
97 PRDM9 orthologs in many non-mammalian species (Baker et al. 2017; Oliver et al. 2009). This  
98 raises the intriguing possibility that some species outside of mammals may also have rapidly  
99 evolving hotspots. It is also possible that PRDM9 is not necessary for rapid evolution of hotspots  
100 in other species and that other mechanisms could lead to the evolution of fine-scale rates of  
101 recombination over short timescales.

102 Threespine stickleback fish (*Gasterosteus aculeatus*) are an excellent system to study the  
103 evolution of fine-scale recombination rates. Multiple populations of threespine stickleback fish  
104 have independently adapted to freshwater environments from marine ancestors in the last 10-15  
105 thousand years (Bell and Foster 1994; Orti et al. 1994), providing the opportunity to study the  
106 parallel evolution of hotspots in well-characterized populations across the Northern Hemisphere  
107 (Bell and Foster 1994; Ostlund-Nilsson et al. 2007; Wootton 1976). Broad-scale recombination  
108 rates have been examined in threespine stickleback using genetic crosses (Glazer et al. 2015;  
109 Peichel et al. 2001; Roesti et al. 2013; Sardell et al. 2018), but fine-scale recombination rates  
110 have not been estimated due to low marker density.

111 Fine-scale recombination rates can be estimated through a variety of approaches.  
112 Recombination rates can be directly measured through genetic linkage maps (Broman et al.  
113 1998; Campbell et al. 2016; Drouaud et al. 2006; Marand et al. 2017) or through sperm  
114 genotyping (Baudat and de Massy 2007; Guillon and de Massy 2002; Jeffreys et al. 2001). Both  
115 methods require a large number of progeny or sperm and a high density of genetic markers to  
116 capture a sufficient number of crossovers. Recombination rates can also be indirectly measured  
117 by identifying the binding sites of proteins that initiate double strand breaks (Pratto et al. 2014;  
118 Smagulova et al. 2011) as well as repair double strand breaks through homologous  
119 recombination (Dumont and Payseur 2011; Froenicke et al. 2002). Another broadly used  
120 approach estimates recombination rates from patterns of linkage disequilibrium (LD) in  
121 populations, providing a historical measure of meiotic crossovers over multiple generations  
122 (Chan et al. 2012; McVean et al. 2004; Myers et al. 2005; Wall and Stevison 2016). LD-based  
123 methods are able to estimate rates at a fine-scale, but rate estimation can be biased by  
124 demographic history (e.g. bottlenecks, population expansions, population sub-structure, etc.)

125 (Dapper and Payseur 2017; Johnston and Cutler 2012), increasing false negative and false  
126 positive rates when calling recombination hotspots (Dapper and Payseur 2017). Despite the  
127 higher error rates, many recombination hotspots identified through LD-based methods have been  
128 validated using other approaches (Jeffreys et al. 2005; Morgan et al. 2017; Myers et al. 2006).

129 Here, we used an LD-based approach to estimate genome-wide recombination rates in a  
130 marine (Puget Sound) and freshwater (Lake Washington) population of threespine stickleback  
131 fish. We found recombination landscapes varied at a fine-scale between the two populations,  
132 often organized into recombination hotspots. We found most recombination hotspots were not  
133 shared between populations. We describe how the complex demographic histories of threespine  
134 stickleback fish populations (Bell and Foster 1994; Ferchaud and Hansen 2016; Hohenlohe et al.  
135 2010; Liu et al. 2016) may influence the overall distribution of recombination hotspots and argue  
136 that the patterns we observe may not be completely driven by population bottlenecks.

137 Additionally, we found little evidence that threespine stickleback hotspots are associated with  
138 PRDM9 binding, indicating hotspots are likely localized by a different mechanism.

139

## 140 **Materials and Methods**

### 141 **Whole genome sequencing and assembly**

142 Genomic DNA was extracted from caudal tail clips of 13 female and 12 male fish  
143 collected from Lake Washington (freshwater population; Washington, USA) and 18 female and  
144 6 male fish collected from Northern Puget Sound (marine population; Washington, USA) using a  
145 standard phenol-chloroform extraction. Paired-end libraries were prepared using the Illumina  
146 TruSeq kit and were size-selected to target 400 bp fragments. Libraries were multiplexed and  
147 sequenced on Illumina NextSeq lanes for 300 cycles (Georgia Genomics and Bioinformatics  
148 Core, University of Georgia). Residual adapter sequences and low quality regions were trimmed  
149 from the sequencing reads using Trimmomatic (v0.33) with the following parameters: PE -phred  
150 33 slidingwindow:4:20. Trimmed reads were aligned to the revised threespine stickleback  
151 genome assembly (supplemental file S5, [https://datadryad.org/resource/doi:10.5061/](https://datadryad.org/resource/doi:10.5061/dryad.q018v/1)  
152 [dryad.q018v/1](https://datadryad.org/resource/doi:10.5061/dryad.q018v/1)) (Glazer et al. 2015) using Bowtie2 (v2.2.4, default parameters) (Langmead and  
153 Salzberg 2012). With these parameters, the average alignment rate for Lake Washington was  
154 94.2% and 87.3% for Puget Sound. Reads with a mapping PHRED quality score of 20 or less  
155 were removed from the analysis (Samtools, v1.2.0, default parameters) (Li et al. 2009). For

156 Puget Sound, four female individuals had 5x or lower sequencing coverage and were removed  
157 from the analysis. After removing poorly aligned reads and low coverage individuals, the  
158 average read coverage across all individuals in each population was 17x and 22x for Lake  
159 Washington and Puget Sound, respectively.

160 Two outgroup species were used to infer ancestral allele states and to estimate mutation  
161 matrices for each population (see Estimation of Recombination Rates). Whole-genome Illumina  
162 sequences for one female ninespine stickleback fish (*Pungitius pungitius*, DRX012173) (White  
163 et al. 2015) and one female blackspotted stickleback fish (*Gasterosteus wheatlandi*,  
164 DRX012174) (Yoshida et al. 2014) were aligned to the revised threespine stickleback genome  
165 assembly (Glazer et al. 2015) using Bowtie2 (v2.2.4). Less stringent alignment parameters were  
166 used to allow for greater sequence divergence between threespine stickleback and each outgroup  
167 (-D 20 -R 3 -N 1 -L 20 -I S,1,0.50 -rdg 3,2 -rfg 3,2 -mp 3). The overall alignment rate of *P.*  
168 *pungitius* was 46.0% whereas the overall alignment rate of *G. wheatlandi* was 74.2%. The higher  
169 alignment rate of *G. wheatlandi* is consistent with *G. wheatlandi* sharing a more recent common  
170 ancestor with *G. aculeatus* (Kawahara et al. 2009).

171

## 172 **SNP genotyping**

173 Single nucleotide polymorphisms (SNPs) were genotyped in each threespine stickleback  
174 population and outgroup species independently following the GATK best practices for SNP  
175 discovery for whole genome sequences (v3.6) (Van der Auwera et al. 2013). PCR duplicates  
176 were removed using MarkDuplicates (REMOVE\_DUPLICATES=true). Regions around  
177 insertions or deletions (indels) were realigned with RealignerTargetCreator (default parameters)  
178 and IndelRealigner (default parameters). Variants were called for each individual using  
179 HaplotypeCaller (genotyping mode DISCOVERY). Joint genotyping (GenotypeGVCFs, default  
180 parameters) was completed by pooling all individuals for each population. Low-quality SNPs  
181 were filtered from the data set using vcftools (v0.1.12b) (Danecek et al. 2011) with the following  
182 filters: removing all sites with more than two alleles, removing sites where genotype data was  
183 missing among individuals, removing sites where the population mean depth coverage was less  
184 than half or greater than twice the average coverage for each population (Lake Washington: 8x –  
185 24x read depth coverage; Puget Sound: 11x - 44x read depth coverage), and removing sites with  
186 a genotype quality score less than 30. Singletons and sites fixed for the alternate allele across all

187 individuals in a population were also removed. After filtering, the Lake Washington population  
188 had 5,054,729 SNPs genome-wide (11 SNPs/kb) and the Puget Sound population had 4,142,876  
189 SNPs (9 SNPs/kb) genome-wide (prior to filtering Lake Washington had 11,937,220 SNPs and  
190 Puget Sound had 11,070,421 SNPs). For the outgroup species, *P. pungitius* and *G. wheatlandi*,  
191 low-quality SNPs were excluded by removing variants with a genotyping quality score less than  
192 30 or a read depth less than two, resulting in 13,691,521 SNPs genome-wide in *G. wheatlandi*  
193 (16,783,618 SNPs prior to filtering) and 7,791,420 in *P. pungitius* (26,173,287 SNPs prior to  
194 filtering).

195

### 196 **Haplotype phasing**

197 Each chromosome was phased independently with SHAPEIT (v2.r837), a read-aware  
198 phasing tool (Delaneau et al. 2013). Phase-informative reads with two heterozygous SNPs on the  
199 same read were identified to assist with the estimation of haplotypes. Phase-informative reads  
200 had a mapping quality score greater than 20. Convergence of the MCMC algorithm was  
201 estimated by examining switch error rates between individual runs. A low switch error rate  
202 would indicate that the MCMC phasing runs have converged on a similar haplotype  
203 configuration. Switch error was measured using vcftools (v0.1.12b) using `-diff-switch-error`  
204 (Danecek et al. 2011). A low switch error was achieved within a reasonable run time with the  
205 following SHAPEIT parameters: `--main 2000 --burn 200 --prune 210 --states 1000` (average  
206 switch error between phasing runs: 0.824% for Lake Washington and 1.26% for Puget Sound).  
207 All other parameters were left at the default values.

208

### 209 **Estimation of recombination rates**

210 Recombination rates were estimated with LDHelmet (v1.7) (Chan et al. 2012). LDHelmet  
211 estimates historical recombination rates from population data by analyzing patterns of linkage  
212 disequilibrium across phased individuals. The ancestral allele state was defined for every SNP in  
213 each threespine stickleback population by comparing to the allele present in the two outgroup  
214 species. An ancestral allele state could not be assigned if a polymorphism was segregating  
215 among the outgroup species. Therefore, SNPs were only assigned an ancestral state if *P.*  
216 *pungitius* and *G. wheatlandi* were homozygous for the same allele. The ancestral allele was  
217 assumed to be the nucleotide carried by *P. pungitius* and *G. wheatlandi*, and was assigned a prior

218 probability of 0.91. To allow for uncertainty in the ancestral allele state, the other three possible  
219 nucleotides were assigned prior probabilities of 0.03. If the ancestral allele state could not be  
220 inferred, the prior probability of each nucleotide being the ancestral allele was set as the overall  
221 frequency of that particular nucleotide on the chromosome. Nucleotide frequencies were  
222 empirically determined from all sites on a threespine stickleback chromosome where *P.*  
223 *pungitius* and *G. wheatlandi* had read coverage that passed the filtering scheme. Mutation  
224 matrices were estimated for each population separately. For every position where an ancestral  
225 allele state could be inferred, the total number of each type of mutation away from the ancestral  
226 allele was quantified. A normalized 4x4 mutation matrix was generated for each chromosome as  
227 previously described (Chan et al. 2012). The ancestral allele state and mutation matrices were  
228 generated using a custom Perl script.

229 Each LDHelmet module was run using the following parameters. Custom Python scripts  
230 were used to create the SNP sequence and SNP position input files. Full FASTA sequence were  
231 created using vcf2fasta from vcflib (available at <https://github.com/vcflib/vcflib>). Haplotype  
232 configuration files were created for each chromosome with the find\_confs module using a  
233 window size of 50 SNPs (-w 50). Likelihood tables were created using table\_gen with the  
234 recommended grid of population scaled recombination rates per base pair ( $\rho$ /bp) (-r 0.0 0.1 10.0  
235 1.0 100.0). Watterson's  $\theta$  was estimated using a custom Python script with the R package,  
236 PopGenome (Pfeifer et al. 2014), where Watterson's  $\theta$  was calculated in 2 kb regions with a  
237 sliding window of 1 kb and all windows were averaged together. To maintain a reasonable  
238 computational time, a single representative likelihood lookup table was generated for the  
239 autosomes of each population from chromosome one, using the average Watterson's  $\theta$  between  
240 Lake Washington and Puget Sound (-t 0.002). Although Watterson's  $\theta$  was different between the  
241 Lake Washington and Puget Sound populations, previous studies have determined that small  
242 changes to parameters such as Watterson's  $\theta$  do not affect the final likelihoods (Auton and  
243 McVean 2007; McVean et al. 2004). Separate likelihood tables were created for the  
244 pseudoautosomal region of the sex chromosomes (chromosome 19). Padé coefficient files were  
245 created using the module pade with a Watterson's  $\theta$  of 0.002 and the recommended 11 padé  
246 coefficients (-t 0.002 -x 11). The module rjmcmm was run for 1 million iterations with 100,000  
247 burn in iterations, a block penalty of 10, and a window size of 50 SNPs (-w 50 -b 10 -burn\_in  
248 100000 -n 1000000). Population-scaled recombination rates were extracted from the rjMCMC



249 run with the post\_to\_text module. Recombination rates were reported in  $\rho$ /bp where  $\rho$  is a  
250 population scaled recombination rate ( $4N_e r$ ).

251

## 252 **Correlation with genetic maps**

253 Population-scaled recombination rates were compared with recombination rates estimated  
254 from a high-density genetic linkage map (Glazer et al. 2015). Recombination rates from  
255 LDHelmet were converted from  $\rho$ /bp to cM/Mb as previously described (Smukowski Heil et al.  
256 2015). Briefly, the recombination rate (cM/Mb) was calculated between every pair of adjacent  
257 markers in the genetic map and a chromosome-wide recombination rate was calculated as the  
258 average among the regions. The average LD-based recombination rate ( $\rho$ /Mb) was computed in  
259 the same individual regions of a chromosome in Lake Washington and Puget Sound by  
260 averaging the per bp rho estimate across the total length of the region ( $\rho$ /Mb). A single  
261 conversion factor was calculated for each chromosome. Each conversion factor was calculated  
262 by dividing the average linkage map recombination rate for a chromosome (in cM/Mb) by the  
263 average LD-based recombination rate ( $\rho$ /Mb) for that chromosome.

264

## 265 **Identification of recombination hotspots**

266 Recombination hotspots were defined using a sliding window approach. In each window,  
267 the average recombination rate within a 2 kb window was compared to the average  
268 recombination rate from the 40 kb regions flanking either side of the 2 kb window. Hotspots  
269 were defined as the 2 kb regions that had a 5-fold or higher recombination rate relative to the  
270 mean recombination rate in the flanking background regions. The 2 kb windows iterated forward  
271 in 1 kb increments. If multiple hotspots were found within a 5 kb region, only the hotspot with  
272 the highest rate was retained. Misassemblies in the reference genome could generate false  
273 hotspots. To limit this, all hotspots that spanned a contig boundary in the reference genome were  
274 removed (384 hotspots out of 4,349 total hotspots). Hotspots were considered shared between  
275 populations if the midpoints of the two hotspots were within 3 kb of each other. Random  
276 permutations were used to calculate the expected amount of hotspot overlap between Lake  
277 Washington and Puget Sound. 10,000 random permutations were drawn from the genome  
278 totaling the number of 2 kb hotspots for each population. Recombination hotspots were identified  
279 and filtered using custom Perl and Python scripts.

280

## 281 **Genetic variation within and between populations**

282         Within population nucleotide diversity ( $\pi$ ) and Tajima's D were calculated separately for  
283 each chromosome. To capture rare variants, previously excluded singletons were included in the  
284 analysis. Nucleotide diversity and Tajima's D were calculated using the R package, PopGenome  
285 (Pfeifer et al. 2014) and a custom Python script. Nucleotide diversity was calculated  
286 between populations by combining SNP variants among all individuals in each population.  
287 Population structure was estimated between Lake Washington and Puget Sound using  
288 FastStructure (v1.0) (Raj et al. 2014). For this analysis, SNPs from Lake Washington and Puget  
289 Sound were merged using vcftools (Danecek et al. 2011) and only biallelic sites with no missing  
290 data were retained. The sex chromosomes (chromosome 19) were also excluded. The final SNP  
291 dataset was composed of 4,113,937 SNPs. Three trials were completed at K values of 1, 2, and 3.  
292 These K values were chosen to differentiate scenarios where Lake Washington and Puget Sound  
293 were one panmictic population (K=1) or Lake Washington and Puget Sound were two distinct  
294 populations (K=2). A K of 3 was chosen to identify any hidden population structure within either  
295 population. The model that best explained the population structure was determined using  
296 chooseK.py (Raj et al. 2014) and the structure plot was visualized using distructK.py (Raj et al.  
297 2014).

298

## 299 **Estimation of demographic history**

300         Demographic history can affect LD-based estimates of recombination rates (Dapper and  
301 Payseur 2017; Johnston and Cutler 2012). To determine whether the demographic history of  
302 threespine stickleback fish could influence the ability to detect recombination hotspots, hotspots  
303 were assayed in simulated haplotypes with known recombination profiles and demographic  
304 histories. Demographic histories used in the simulations were based on the estimated histories of  
305 Lake Washington and Puget Sound, modeled using a Pairwise Sequentially Markovian  
306 Coalescent (PSMC) process with default parameters (Li and Durbin 2011; Liu and Hansen  
307 2017). PSMC was run on one female from Lake Washington and one female from Puget Sound.  
308 Confidence intervals were estimated on 100 bootstrap replicates. Demographic histories were  
309 visualized using psmc\_plot.pl (Li and Durbin 2011).

310

### 311 **Simulations using estimated demographic histories**

312 Using the demographic histories estimated with PSMC, 250 kb haplotypes with four 2 kb  
313 recombination hotspots were simulated using the program fin, part of the LDHat software  
314 package (Auton and McVean 2007; McVean et al. 2004). The hotspots were placed 50 kb apart at  
315 75, 125, 175, and 225 kb. The background recombination rate was set at 0.03  $\rho$ /kb. Hotspots had  
316 varied intensities from 2 to 20 times the background rate, set at 0.06  $\rho$ /kb, 0.15  $\rho$ /kb, 0.3  $\rho$ /kb,  
317 and 0.6  $\rho$ /kb. One scenario simulated a constant effective population size, with 500 sequences,  
318 40 haplotypes each, with an average Watterson's  $\theta$  of 0.00355, the average between Lake  
319 Washington and Puget Sound (`-nsamp 40 -len 250000 -theta 0.00355`). For both populations, a  
320 bottleneck was simulated 8,000 generations ago (Puget Sound:  $t = 0.029$ ,  $\theta = 0.0036$ ; Lake  
321 Washington:  $t = 0.022$ ,  $\theta = 0.0035$ ). Two bottleneck strengths were simulated by setting the  
322 probability that a lineage coalesces to 10% or 90% ( $s = 0.1, 0.9$ ). Overall, hotspot sharing  
323 between simulated Lake Washington and simulated Puget Sound populations was quantified by  
324 examining all pairwise comparisons between populations and bottleneck strengths. The first  
325 hotspot simulated should not be called using our method as it falls below our cutoff, but can  
326 provide information about how hotspots that fall below our cutoff affect hotspot calling. The  
327 number of false positive and false negative hotspots were calculated using custom Python scripts.  
328

### 329 **Location of hotspots around transcription start sites**

330 Transcript annotations from Ensembl (build 90) were lifted to the revised threespine  
331 stickleback genome assembly (Glazer et al. 2015) by aligning each transcript using BLAT (v36,  
332 default parameters) (Kent 2002). Aligned transcripts were only retained if the entire transcript  
333 aligned to the revised genome assembly. Transcript start sites (TSSs) consisted of a 2 kb region,  
334 centered at the start position of the transcript. A hotspot was considered overlapping with a TSS  
335 if the midpoint of the hotspot overlapped with any part of a 2 kb TSS region. Enrichment of  
336 hotspots in TSSs were compared against 10,000 random permutations. 2 kb regions were  
337 randomly drawn across the genome, totaling the number of hotspots identified in each  
338 population. TSS annotation filtering, overlap of hotspots with TSSs, and random permutations  
339 were completed using custom Python scripts.

340

### 341 **GC-Biased Substitutions**

342 GC to AT and AT to GC substitutions were quantified within 2 kb regions of the genome  
343 that had recombination rates in the top and bottom 5% as well as within all 2 kb recombination  
344 hotspots. The top 5% of recombination rates captures regions of the genome that may broadly  
345 have high recombination rates and not contain recombination hotspots. The top 5% of  
346 recombination rates includes 96 hotspots for Lake Washington (out of 1,627 hotspots) and 314  
347 hotspots for Puget Sound (out of 2,338 hotspots). The equilibrium GC content was calculated as  
348 the proportion of AT to GC substitutions out of the total pool of substitutions (AT to GC and GC  
349 to AT) (Meunier and Duret 2004; Singhal et al. 2015; Sueoka 1962). To increase the total  
350 number of sites available for the analysis, the ancestral allele state was inferred using only *G.*  
351 *wheatlandi*, rather than requiring a matching ancestral allele in both *G. wheatlandi* and *P.*  
352 *pungitius*. Because CpG sites can have higher mutation rates (Fryxell and Moon 2005; Weber et  
353 al. 2014), all consecutive CG sites in the ancestral sequence were removed from the analysis.

354

### 355 **DNA motif identification**

356 MEME (v4.11.0) was used to identify novel DNA motifs enriched in hotspots and  
357 matched coldspots (Bailey and Eklán 1994). Each hotspot was matched to a randomly selected 2  
358 kb coldspot, which was located at least 25 kb from any identified hotspot, contained a GC  
359 nucleotide content that was within 2% of the hotspot after removing ancestral CpG sites (GC-  
360 matched), and had a mean recombination rate that was less than half the background  
361 recombination rate of the population (Lake Washington: less than 0.017  $\rho$ /bp; Puget Sound: less  
362 than 0.035  $\rho$ /bp). MEME ignored motif occurrences if they were present in a hotspot multiple  
363 times (-mod zoops). This was to prevent the reporting of repetitive motifs. MEME was run  
364 separately for each chromosome and population and was completed when 50 motifs were  
365 identified (-nmotifs 50). Motif identification was conducted separately for shared hotspots and  
366 population-specific hotspots.

367 The DNA-binding protein, PRDM9, is important for localizing recombination hotspots in  
368 mammals (Baker et al. 2015; Baudat et al. 2010; Billings et al. 2013; Brick et al. 2012; Myers et  
369 al. 2010; Myers et al. 2008; Parvanov et al. 2010; Powers et al. 2016; Pratto et al. 2014). To  
370 determine if any PRDM genes had a role in localizing hotspots in threespine stickleback fish,  
371 FIMO (v4.11.0, default parameters) (Grant et al. 2011) was used to scan hotspot sequences for  
372 the predicted DNA binding motifs for each of the 11 annotated PRDM genes in the threespine

373 stickleback genome (Ensembl, build 90). DNA binding motifs for each PRDM protein were  
374 predicted using the Cys<sub>2</sub>His<sub>2</sub> zinc finger prediction tool, Predicting DNA-binding Specificities  
375 for the Cys<sub>2</sub>His<sub>2</sub> Zinc Finger Proteins (Persikov et al. 2009; Persikov and Singh 2014). Predicted  
376 zinc finger domains were included if the HMMER bit score for the zinc fingers was 17.7 or  
377 higher (Persikov et al. 2009; Persikov and Singh 2014). To determine the expected number of  
378 occurrences of a motif of the same length and GC composition in hotspots, the PRDM motifs  
379 were shuffled 100 separate times. FIMO was run on the shuffled motifs to create a null  
380 distribution. Motifs were shuffled using a custom python script.

381

## 382 **Results**

### 383 **Genetic differentiation between Lake Washington and Puget Sound**

384 Freshwater populations of threespine stickleback fish frequently exhibit signs of past  
385 bottlenecks, consistent with their colonization from marine ancestors ~10-15 thousand years ago  
386 (Bell and Foster 1994; Ferchaud and Hansen 2016; Hohenlohe et al. 2010; Liu et al. 2016).  
387 Given the recent divergence and the close geographic proximity between Lake Washington  
388 (freshwater) and Puget Sound (marine), we first examined whether these two populations were  
389 genetically distinct. Using FastStructure, a two population model was the most highly supported  
390 (marginal likelihood = -0.834, Supplemental Figure 1).

391 Within each population, we explored whether there were signatures of past bottleneck  
392 events. The average nucleotide diversity within both populations was similar (Lake Washington:  
393 0.003; Puget Sound: 0.003), whereas the genome-wide average nucleotide diversity between  
394 populations was 0.004. The nucleotide diversity values we calculated are similar to previously  
395 reported values for other marine and freshwater stickleback populations (Guo et al. 2015;  
396 Hohenlohe et al. 2010; Kitano et al. 2007). Both populations had negative Tajima's D values  
397 (Tajima 1989), consistent with an excess of rare variants from a recent population expansion  
398 (Lake Washington: -0.422; Puget Sound: -0.723).

399 The demographic histories of Lake Washington and Puget Sound were estimated using  
400 Pairwise Sequentially Markovian Coalescent (PSMC) models (Figure 1). Puget Sound  
401 experienced a bottleneck from around 18,000 years ago until about 8,000 years ago where the  
402 effective population size decreased to  $74,250 \pm 1,259$  individuals (starting  $N_e = 132,700 \pm 796$ )  
403 while Lake Washington experienced a small bottleneck around the same time where the effective

404 population size decreased to  $91,760 \pm 1,960$  individuals (starting  $N_e = 129,138 \pm 897$ ) (Figure 1).  
405 Both populations have had a constant effective population size for the last ~5,000 years. Puget  
406 Sound has a larger effective population size than Lake Washington, matching the expected  
407 pattern of marine populations having larger effective population sizes than freshwater  
408 populations (DeFaveri and Merila 2015; Gow et al. 2006; Makinen et al. 2006).

409

#### 410 **Fine-scale estimation of recombination rates across the genome**

411 Using a dense set of SNP markers from whole-genome sequencing, we estimated  
412 recombination rates across the genomes of Lake Washington and Puget Sound threespine  
413 stickleback fish. The average genome-wide population recombination rate in Lake Washington  
414 was half of the rate observed in Puget Sound (Lake Washington: 0.035  $\rho$ /bp; Puget Sound: 0.072  
415  $\rho$ /bp; Wilcoxon Rank Test;  $p < 0.001$ , Supplemental Table 1). Despite having an overall lower  
416 genome-wide recombination rate in Lake Washington, recombination rates were largely  
417 conserved at broad scales between the two populations. We observed a highly significant  
418 positive correlation of recombination rates between the populations at the scale of 500 kb  
419 windows (Spearman's Rank Correlation;  $r = 0.931$ ,  $p < 0.001$ ; Figure 2; Supplemental Figure 2).  
420 Additionally, recombination rates were lower at the center of chromosomes (center 25% of all  
421 chromosomes) and significantly higher at the ends of the chromosomes (terminal 25% of all  
422 chromosomes) for both populations (Wilcoxon Rank Test; Lake Washington: ends of  
423 chromosomes = 0.069  $\rho$ /bp, center of chromosomes = 0.009  $\rho$ /bp,  $p < 0.001$ ; Puget Sound: ends  
424 of chromosomes = 0.108  $\rho$ /bp, center of chromosomes = 0.016  $\rho$ /bp,  $p < 0.001$ ; Figure 2). Rate  
425 differences at chromosome ends have been documented in other populations of threespine  
426 stickleback (Glazer et al. 2015; Roesti et al. 2013; Sardell et al. 2018) as well as across a wide-  
427 range of other animals, plants, and fungi (Barton et al. 2008; Berner and Roesti 2017; Broman et  
428 al. 1998; See et al. 2006).

429 To determine whether the broad-scale recombination rates we estimated from LD-based  
430 methods are concordant with recombination rates measured from linkage mapping, we compared  
431 the rates from Lake Washington and Puget Sound with the rates estimated from a genetic linkage  
432 map from a freshwater female and a marine male (Glazer et al. 2015). We found a significant  
433 positive correlation between recombination rates in both populations and the linkage map  
434 (Spearman's Rank Correlation; Lake Washington:  $r = 0.830$ ,  $p < 0.001$ ; Puget Sound:  $r = 0.810$ ,

435  $p < 0.001$ ; Figure 3). These data indicate that broad-scale changes are conserved across multiple  
436 populations of threespine stickleback fish and confirm that the recombination rates estimated  
437 from LD-based methods largely parallel the rates observed from genetic linkage maps. Although  
438 broad-scale (Mb) recombination rates tend to be conserved over longer evolutionary timescales  
439 (Fleidel-Alon et al. 2009; Kong et al. 2002; Serre et al. 2005; Stevison et al. 2015), fine-scale (kb)  
440 rates within chromosomes can rapidly evolve (Barton et al. 2008; Hellsten et al. 2013; McVean  
441 et al. 2004; Myers et al. 2005). In many organisms, recombination is organized locally into  
442 narrow regions of very high rates (i.e. “hotspots”), surrounded by regions of little to no  
443 recombination (i.e. “coldspots”) (Baudat et al. 2010; Jeffreys et al. 1998; Steiner et al. 2002).  
444 Consistent with this, we found highly variable fine-scale recombination rates across individual  
445 chromosomes in both Lake Washington and Puget Sound (Figure 4; Supplemental Figures 3 and  
446 4).

447

#### 448 **Divergent hotspot locations between populations of threespine sticklebacks**

449 Using a sliding-window approach, we identified 2,338 hotspots in Puget Sound and 1,627  
450 hotspots in Lake Washington. Strikingly, only 312 of these hotspots were shared between  
451 populations (13.3% of hotspots in Puget Sound and 19.2% of hotspots in Lake Washington).  
452 This lack of hotspot overlap between Lake Washington and Puget Sound may, in part, be due to  
453 hotspots falling just below the hotspot threshold. To investigate this, we looked for any increase  
454 in recombination rate in locations where hotspots were present in one population, but absent in  
455 the other. We found little evidence of a localized increase in recombination rate in these regions.  
456 Recombination rates were close to the background rate in the population where hotspots were  
457 deemed absent (Figures 5A and 5B). This pattern was even more apparent when shared hotspots  
458 were removed from the analysis (Figures 5C and 5D). The small degree of overlap we observed  
459 in hotspots between the populations was much greater than what would be expected from chance  
460 alone (10,000 random permutations;  $p < 0.001$ ; Supplemental Figure 5), indicating much of the  
461 hotspot overlap likely represents shared ancestry.

462

#### 463 **Increased recombination rate in the pseudoautosomal region**

464 Genetic recombination between sex chromosomes is restricted to the pseudoautosomal  
465 region (PAR), where rates of recombination can be orders of magnitude above genome-wide

466 averages (Otto et al. 2011; Wright et al. 2016). In threespine stickleback, crossing over between  
467 the X and Y chromosomes is restricted to a ~2.5 Mb PAR (Peichel et al. 2004; Roesti et al. 2013;  
468 White et al. 2015; Yoshida et al. 2014). Because of the potential for high rates of crossing over in  
469 the PAR, we estimated population-scaled recombination rates for this region independently from  
470 the autosomes. The average recombination rate in the PAR was 0.232  $\rho$ /bp for Puget Sound and  
471 0.129  $\rho$ /bp for Lake Washington. These rates were significantly higher than the average  
472 recombination rate across the autosomes (Lake Washington autosome average rate: 0.035  $\rho$ /bp,  $p$   
473  $<0.001$ ; Puget Sound autosome average rate: 0.072  $\rho$ /bp,  $p < 0.001$ ; Figure 6). Although we  
474 observed some fine-scale variation in recombination rates across the PAR (Figure 6), we  
475 identified very few hotspots, which may be due to the increased background recombination rate  
476 across the PAR.

477

#### 478 **Demographic history may not completely account for hotspot divergence**

479 To explore how changes in past effective population size ( $N_e$ ) may have affected our  
480 ability to detect hotspots, we simulated haplotypes with known demographic histories that  
481 followed the demographic histories we estimated from Lake Washington and Puget Sound, along  
482 with a known distribution of recombination hotspots. If the minimal hotspot overlap we observed  
483 between populations of threespine stickleback fish was because of high false positive and false  
484 negative rates induced by demographic history, we would expect hotspots to be incorrectly called  
485 to a similar degree in the bottleneck simulations. Both bottleneck strengths exhibited elevated  
486 false positive and false negative rates compared to the control simulation, with the highest false  
487 positive and false negative rates under the strong bottleneck scenario (Supplemental Table 2). To  
488 determine the overall effect of elevated error rates on determining the number of shared hotspots  
489 between populations, we compared the simulated Lake Washington haplotypes to the simulated  
490 Puget Sound haplotypes from both bottleneck scenarios. Despite the elevated error rates, hotspot  
491 sharing was higher between the simulated populations than the observed number of hotspots  
492 shared between actual Lake Washington and Puget Sound populations for the weak bottleneck  
493 (weak bottleneck: Lake Washington: 59.7%; Puget Sound: 55.2%; actual Puget Sound shared  
494 hotspots: 13.3%; actual Lake Washington shared hotspots: 19.2%). This indicates that a weak  
495 bottleneck in both populations is not sufficient to drive the high degree of hotspot divergence we  
496 observed. However, if the bottleneck strength was very high ( $s=0.9$ ) in both populations,



497 elevated error rates in hotspot calling could result in a lack of hotspot overlap that mirrors the  
498 divergence we observed between populations. In this simulation, there was a similar percent of  
499 shared hotspots as observed in the actual populations (strong bottleneck: Lake Washington:  
500 20.7%; Puget Sound: 19.8%; actual Puget Sound shared hotspots: 13.3%; actual Lake  
501 Washington shared hotspots: 19.2%).

502 Based on the demographic histories we estimated, Lake Washington experienced a less  
503 intense bottleneck than Puget Sound. We therefore also used simulations to explore the expected  
504 hotspot overlap if only one of the populations experienced a strong bottleneck. If Puget Sound  
505 experienced a strong bottleneck and Lake Washington experienced a weak bottleneck, 36.7% of  
506 hotspots were shared in the simulated Lake Washington population and 20.5% of hotspots were  
507 shared in the simulated Puget Sound population (actual Lake Washington shared hotspots:  
508 19.2%, actual Puget Sound shared hotspots: 13.3%). Except for a scenario where both  
509 populations underwent a severe bottleneck in the past, our simulations suggest that demographic  
510 history alone is not sufficient to completely explain the divergence we observed in hotspot  
511 location between populations.

512

### 513 **Hotspots are enriched around transcription start sites**

514 Hotspot localization in genomes varies among taxa. In yeast, birds, and some plants,  
515 where hotspots are evolutionarily conserved, hotspots tend to be enriched within transcription  
516 start sites (Kawakami et al. 2017; Pan et al. 2011; Singhal et al. 2015; Tischfield and Keeney  
517 2012). In mammals with rapidly evolving hotspots, hotspots are typically located away from  
518 genic regions (Brick et al. 2012; Brunschwig et al. 2012; Myers et al. 2005). We investigated  
519 whether threespine stickleback fish hotspots mimic either of the patterns seen in other systems.  
520 We found an enrichment of hotspots around TSSs, compared to random permutations of hotspots  
521 (Lake Washington: 26% of hotspots fell within 3 kb of a TSS,  $p < 0.034$ ; Puget Sound: 29% of  
522 hotspots fell within 3 kb of a TSS,  $p < 0.001$ ; Supplemental Figure 6). This pattern also held  
523 when examining only population specific hotspots (Lake Washington:  $p = 0.007$ ; Puget Sound:  $p$   
524  $< 0.001$ ; Supplemental Figure 7); however, shared hotspots were not enriched in TSSs compared  
525 to random permutations (Lake Washington:  $p = 0.370$ ; Puget Sound:  $p = 0.827$ ; Supplemental  
526 Figure 6). The lack of significant enrichment of shared hotspots around TSSs is likely due to the  
527 small sample size. When we randomly drew samples from the population-specific hotspots that

528 were equal in size to the shared hotspot pools, there was no longer enrichment around TSSs  
529 (Lake Washington:  $p = 0.947$ ; Puget Sound:  $p = 0.808$ ).

530

### 531 **Regions of high recombination exhibit GC-biased nucleotide substitution**

532       Recombination leaves distinct signatures of nucleotide substitution across the genome  
533 (Duret and Arndt 2008; Mugal et al. 2015; Webster and Hurst 2012). Over time, the repair of  
534 heteroduplex DNA during meiosis favors the substitution of GC nucleotides over AT  
535 nucleotides, which increases the frequency of GC nucleotides, leading to GC-biased base  
536 composition (Lesecque et al. 2013; Marais 2003; Meunier and Duret 2004). Regions of the  
537 genome with higher recombination rates tend to have higher GC-biased base composition  
538 (Kawakami et al. 2017; Kong et al. 2002; Meunier and Duret 2004; Singhal et al. 2015). To  
539 determine whether regions of higher recombination rate showed signatures of GC-biased gene  
540 conversion, we calculated equilibrium GC content (Meunier and Duret 2004; Singhal et al. 2015;  
541 Sueoka 1962) in regions of the genome with the highest and lowest recombination rates (top and  
542 bottom 5%) as well as within recombination hotspots.

543       In both Lake Washington and Puget Sound, we detected a significantly higher  
544 equilibrium GC content in regions of the genome with a high recombination rate (top 5% of  
545 recombination rates among 2 kb windows) compared to regions of the genome with  
546 recombination rates in the bottom 5% (Table 1). Overall, these results indicate GC nucleotide  
547 composition is influenced by the historical recombination landscape across the threespine  
548 stickleback genome. Interestingly, although hotspots in both populations have locally elevated  
549 recombination rates, there was not a parallel increase in equilibrium GC content. Equilibrium GC  
550 content in population-specific hotspots and shared hotspots was not significantly different than  
551 regions of the genome with the lowest recombination rates (bottom 5%) (Table 1). Our results  
552 are consistent with recombination hotspots being more recently derived, where locally increased  
553 recombination rates have not yet had an effect on GC-biased nucleotide substitution.

554

### 555 **PRDM genes are weakly associated with threespine stickleback recombination hotspots**

556       Hotspots in many species are targeted to specific regions of the genome by DNA binding  
557 motifs (Baudat et al. 2010; Kon et al. 1997; Myers et al. 2008; Steiner et al. 2002). In species  
558 where PRDM9 targets recombination hotspots to specific regions of the genome, the zinc finger

559 domain of PRDM9 is typically under strong positive selection (Baker et al. 2015; Baudat et al.  
560 2010; Billings et al. 2013; Myers et al. 2010; Oliver et al. 2009; Pratto et al. 2014) and the  
561 protein contains functional KRAB and SSXRD domains (Baker et al. 2017). In Teleost fish, two  
562 paralogs of PRDM9 have been identified, PRDM9 $\alpha$  which contains all the protein domains and  
563 PRDM9 $\beta$  which lacks the KRAB and SSXRD domains (Baker et al. 2017). Threespine  
564 stickleback fish appear to have lost PRDM9 $\alpha$ , but retain PRDM9 $\beta$  without the SSXRD and  
565 KRAB domains. Consistent with a lack of function directing recombination hotspots, we did not  
566 observe strong signatures of positive selection in the zinc finger domain of PRDM9 $\beta$ . We found  
567 zero fixed differences between threespine and blackspotted stickleback for the PRDM9 ortholog.  
568 There was one synonymous and one nonsynonymous mutation at moderate frequency in Lake  
569 Washington and two synonymous and three nonsynonymous mutations at moderate frequency in  
570 Puget Sound, indicating these mutations are likely not causing the population-specific  
571 localization of hotspots we observed between Lake Washington and Puget Sound.

572 We also examined whether the predicted binding sites of any of the 11 previously  
573 annotated PRDM genes in threespine stickleback fish were enriched in recombination hotspots.  
574 Less than 14% of hotspots contained any of the predicted PRDM zinc finger binding domain  
575 motifs (Supplemental Table 3). However, six of the motifs were significantly enriched in  
576 hotspots, including PRDM9, when compared to scrambled motifs of the same size and GC  
577 content (Supplemental Table 3), indicating PRDM genes could have some role in localizing a  
578 subset of recombination hotspots. Outside of PRDM9 in mammals, multiple DNA binding motifs  
579 assist with hotspot targeting in other systems such as *Schizosaccharomyces pombe* (Kon et al.  
580 1997; Steiner et al. 2002). To see if other DNA motifs were targeting hotspots in threespine  
581 stickleback fish, we searched for motifs enriched in hotspots. The most significant motifs  
582 identified were simple mono- or di-nucleotide repeats which were present only in a subset of the  
583 hotspots (Supplemental Figure 8). These repeats were not specific to hotspots as they were also  
584 found in GC-matched coldspots.

585

## 586 **Discussion**

### 587 **Broad-scale recombination rates across the threespine stickleback genome**

588 At a broad scale, recombination rates across the threespine stickleback genome were  
589 conserved between the two populations. This broad scale conservation of recombination rates is

590 a feature observed in many taxa (Fleidel-Alon et al. 2009; Kong et al. 2002; Serre et al. 2005;  
591 Stevison et al. 2015) and may reflect the necessity of crossing over for the proper segregation of  
592 chromosomes during meiosis (Davis and Smith 2001; Fleidel-Alon et al. 2009; Kaback et al.  
593 1992; Mather 1936). Additionally, we observed differential rates of recombination associated  
594 with broad genomic regions that have been observed in other systems. First, we observed higher  
595 recombination rates towards the telomeres. In many species, the ends of chromosomes have  
596 higher rates of recombination (Barton et al. 2008; Berner and Roesti 2017; Kong et al. 2002;  
597 Roesti et al. 2013; Sardell et al. 2018), which is thought to be driven by male-specific  
598 localization of recombination (Broman et al. 1998; Moen et al. 2008; Singer et al. 2001). Our  
599 LD-based method estimates sex-averaged recombination rates, which does not allow us to test  
600 whether the pattern we observed around the ends of chromosomes is driven by males. However,  
601 sex-specific genetic linkage maps between the Japan Sea stickleback (*Gasterosteus nipponicus*)  
602 and the threespine stickleback (*G. aculeatus*) corroborate this pattern (Sardell et al. 2018).  
603 Second, we observed higher recombination rates in the pseudoautosomal region compared to the  
604 autosomes. Recombination rates in pseudoautosomal regions are often orders of magnitude  
605 above autosome-wide averages, as an obligate crossover should occur between the X and Y  
606 chromosomes in these small regions during every male meiosis (Hinch et al. 2014; Kauppi et al.  
607 2012; Otto et al. 2011).

608 Overall, the genome-wide average recombination rate for Puget Sound was two-fold  
609 higher than in Lake Washington. Rate variation between populations or species can be driven by  
610 a number of processes. Structural variation (i.e. inversions, chromosomal rearrangements, and  
611 copy number variants) can contribute to rate variation among genomes. Indeed, recombination  
612 rates have been shown to vary across chromosomal regions due to segregating inversions  
613 between marine and freshwater populations of threespine stickleback (Glazer et al. 2015; Jones  
614 et al. 2012). Although structural variants could explain rate differences between Lake  
615 Washington and Puget Sound populations at a more localized level, they cannot explain the  
616 genome-wide rate differences we observed. Over longer evolutionary timescales, recombination  
617 rate also can evolve neutrally (Dumont and Payseur 2008), driving genome-wide rate variation  
618 between species. However, neutral divergence is likely not occurring at a pace that would alter  
619 genome-wide recombination rates between recently diverged populations of threespine  
620 stickleback fish. One plausible explanation for the observed rate differences is differences in

621 demographic history between the Lake Washington and Puget Sound populations. A larger  
622 effective population size could increase the population-scaled recombination rate (Burt 2000;  
623 Charlesworth 2009). In threespine stickleback, marine populations typically have a larger  $N_e$   
624 than freshwater populations (DeFaveri and Merila 2015; Gow et al. 2006; Makinen et al. 2006),  
625 consistent with our observed pattern of a higher recombination rate in Puget Sound relative to  
626 Lake Washington.

627

### 628 **Identifying hotspots using patterns of linkage disequilibrium**

629 LD-based estimates of recombination rates can be affected by demographic processes  
630 that change patterns of linkage disequilibrium across the genome (Chan et al. 2012; Dapper and  
631 Payseur 2017; Johnston and Cutler 2012; McVean et al. 2004; Wall and Stevison 2016). The  
632 duration and timing of these events can have varying effects on hotspot identification, often  
633 reducing the power to detect hotspots and increasing the rate of errors (Dapper and Payseur  
634 2017). Threespine stickleback fish have a complex history of bottleneck events and population  
635 expansions over the last 10-15 thousand years which vary across geographic regions (Bell and  
636 Foster 1994; Ferchaud and Hansen 2016; Hohenlohe et al. 2010; Liu et al. 2016; Orti et al.  
637 1994). Based on simulations, demographic history likely has some role in the observed  
638 divergence in hotspot location between Lake Washington and Puget Sound populations, but it  
639 seems likely that population demography does not completely explain the pattern. Only in the  
640 scenario where both populations experienced a strong bottleneck do error rates rise high enough  
641 to mimic the observed divergence in hotspot location. However, our estimates of effective  
642 population size over time revealed that Lake Washington and Puget Sound did not experience  
643 similar fluctuations. Both populations began with effective population sizes that largely parallel  
644 those observed in other threespine stickleback fish populations (Liu and Hansen 2017; Ravinet et  
645 al. 2018). Puget Sound then experienced a larger population expansion roughly 18,000 years ago,  
646 followed with a decrease in population size at approximately 8,000 years ago. Lake Washington  
647 had a slight increase in population size, followed by a small bottleneck around the same time, but  
648 overall changes in effective population size were more stable in this population. Examination of  
649 where recombination hotspots are currently forming across the genome in Lake Washington and  
650 Puget Sound would help confirm the patterns we observed. Surveys of double strand break  
651 hotspots (Pratto et al. 2014; Smagulova et al. 2011) or crossover breakpoints in genetic crosses

652 (Broman et al. 1998; Campbell et al. 2016; Drouaud et al. 2006; Marand et al. 2017) would  
653 reveal the degree to which recombination hotspots are targeted to different genomic locations in  
654 these two populations.

655

### 656 **Hotspot evolution in freshwater and marine threespine stickleback populations**

657 Of the 3,965 hotspots between Lake Washington and Puget Sound, only ~15% of  
658 hotspots are shared, indicating many of the hotspots are recently derived within populations of  
659 threespine stickleback fish. Consistent with the recent evolution of hotspots, we did not observe  
660 an elevated equilibrium GC content in these regions. One possible model is that recombination  
661 hotspots can shift over short evolutionary timescales among regions of the genome that are  
662 susceptible to homologous recombination, such as regions of accessible chromatin. Both  
663 evolutionarily conserved and rapidly evolving hotspots tend to locate to regions of accessible  
664 chromatin (Lam and Keeney 2015; Ohta et al. 1994; Pan et al. 2011; Tischfield and Keeney  
665 2012) or regions with histone 3 lysine 4 trimethylation (H3K4me3) (Auton et al. 2013; Baker et  
666 al. 2015; Marand et al. 2017; Smagulova et al. 2011).

667 In taxa where hotspots are evolutionarily conserved, hotspots are highly enriched around  
668 TSSs (Auton et al. 2013; Kawakami et al. 2017; Pan et al. 2011; Singhal et al. 2015; Tischfield  
669 and Keeney 2012). This pattern could be due to either higher selective constraints at TSSs or the  
670 chromatin structure at TSSs. TSSs are often under purifying selection and if a genomic feature,  
671 like a DNA motif, is targeting hotspots to these regions, these features would also be preserved  
672 through purifying selection, maintaining the location of the hotspot (Kawakami et al. 2017; Lam  
673 and Keeney 2015; Singhal et al. 2015; Tsai et al. 2010). On the other hand, an open chromatin  
674 conformation could be driving this pattern. TSSs and the surrounding regions must be accessible  
675 for transcription to occur while also providing sites for Spo11 to bind, initiating recombination  
676 (Lee et al. 2004; Pokholok et al. 2005) as Spo11 will create double strand breaks at any sites with  
677 accessible chromatin (Celerin et al. 2000; Ohta et al. 1994; Pan et al. 2011). In Lake Washington  
678 and Puget Sound populations, we found some enrichment of hotspots at TSSs (Lake Washington:  
679 26% of hotspots fell within 3 kb of a TSS; Puget Sound: 29% of hotspots fell within 3 kb of a  
680 TSS) which is similar to hotspot enrichment around TSS in taxa that do not have a functional  
681 PRDM9 protein. In birds and dogs, for example, ~20-30% of hotspots overlap with TSSs (Auton  
682 et al. 2013; Kawakami et al. 2017; Singhal et al. 2015). Additional characterization is needed to

683 determine if hotspots in threespine stickleback are occurring in regions of the genome that are  
684 already open due to transcription or if there is a mechanism that creates accessible chromatin  
685 specifically for double strand break formation, like what is believed to occur with PRDM9 in  
686 mammalian species (Diagouraga et al. 2018; Hayashi et al. 2005; Powers et al. 2016).

687 In some mammalian systems, positive selection acting on the zinc finger binding domain  
688 of PRMD9 has led to multiple distinct DNA binding motifs between closely related species  
689 (Baudat et al. 2010; Myers et al. 2010; Myers et al. 2008; Pratto et al. 2014). This leads to a rapid  
690 evolution of hotspot localization (Baker et al. 2015; Brick et al. 2012; Pratto et al. 2014;  
691 Smagulova et al. 2016; Stevison et al. 2015). Typically, ~40% of hotspots will contain a PRDM9  
692 motif in mouse and humans (Baudat et al. 2010; Myers et al. 2008). In threespine stickleback  
693 fish, we found that less than 14% of hotspots had PRMD9 or any other PRDM motifs, contrary  
694 to what we would expect if PRDM9 was controlling hotspot location in threespine stickleback.  
695 In addition, we did not find any other DNA motifs enriched in hotspots that would indicate a role  
696 of an alternative DNA-binding protein that could localize hotspots. Additional characterization is  
697 needed to understand what genomic features could be targeting hotspots, leading to the distinct  
698 fine-scale recombination landscapes observed between populations of threespine stickleback  
699 fish.

700

## 701 **Acknowledgements**

702 This work was supported by the Office of the Vice President of Research at the  
703 University of Georgia (M.A.W); and the National Institute of Health (T32GM007103 to A.F.S).  
704 We thank Robert Schmitz for help with library preparations and Catherine Peichel for providing  
705 population samples. Sequencing was conducted at the Georgia Genomics and Bioinformatics  
706 Core at the University of Georgia. Raw sequences are deposited in NCBI's Short Read Archive,  
707 reference number SRP137809 (<https://submit.ncbi.nlm.nih.gov/subs/sra/SUB3748706/overview>)  
708 and custom scripts can be found on Open Science Framework under A.F.S.  
709 (<https://osf.io/dezug/>).

## References

- Auton A, McVean G 2007. Recombination rate estimation in the presence of hotspots. *Genome Res* 17: 1219-1227. doi: 0.1101/gr.6386707
- Auton A, et al. 2013. Genetic recombination is targeted towards gene promoter regions in dogs. *PLoS Genet* 9: e1003984. doi: 10.1371/journal.pgen.1003984
- Bailey TL, Eklán C 1994. Fitting a mixture model by expectation maximization to discover motifs in biopolymers. *Proceedings of the Second International Conference on Intelligent Systems for Molecular Biology*: 28-36.
- Baker CL, et al. 2015. PRDM9 drives evolutionary erosion of hotspots in *Mus musculus* through haplotype-specific initiation of meiotic recombination. *PLoS Genet* 11: e1004916. doi: 10.1371/journal.pgen.1004916
- Baker Z, et al. 2017. Repeated losses of PRDM9-directed recombination despite the conservation of PRDM9 across vertebrates. *Elife* 6: e24133. doi: 10.7554/eLife.24133
- Barton AB, Pekosz MR, Kurvathi RS, Kaback DB 2008. Meiotic recombination at the ends of chromosomes in *Saccharomyces cerevisiae*. *Genetics* 179: 1221-1235. doi: 10.1534/genetics.107.083493
- Baudat F, et al. 2010. PRDM9 is a major determinant of meiotic recombination hotspots in humans and mice. *Science* 327: 836-840.
- Baudat F, de Massy B 2007. Regulating double-stranded DNA break repair towards crossover or non-crossover during mammalian meiosis. *Chromosome Res* 15: 565-577. doi: 10.1007/s10577-007-1140-3
- Bell MA, Foster SA. 1994. *The evolutionary biology of the threespine stickleback*: Oxford ; New York : Oxford University Press, 1994.
- Berner D, Roesti M 2017. Genomics of adaptive divergence with chromosome-scale heterogeneity in crossover rate. *Mol Ecol* 26: 6351-6369. doi: 10.1111/mec.14373
- Billings T, et al. 2013. DNA binding specificities of the long zinc-finger recombination protein PRDM9. *Genome Biol* 14: R35. doi: 10.1186/gb-2013-14-4-r35
- Brick K, et al. 2012. Genetic recombination is directed away from functional genomic elements in mice. *Nature* 485: 642-645. doi: 0.1038/nature11089
- Broman KW, et al. 1998. Comprehensive human genetic maps: individual and sex-specific variation in recombination. *Am J Hum Genet* 63: 861-869.
- Brunschwig H, et al. 2012. Fine-scale maps of recombination rates and hotspots in the mouse genome. *Genetics* 191: 757-764. doi: 10.1534/genetics.112.141036
- Burt A 2000. Perspective: Sex, recombination, and the efficacy of selection - was Weismann right? *Evolution* 54: 337-351.
- Campbell CL, et al. 2016. A pedigree-based map of recombination in the domestic dog genome. *G3-Genes Genom Genet* 6: 3517-3524. doi: 10.1534/g3.116.034678
- Celerin M, et al. 2000. Multiple roles of Spo11 in meiotic chromosome behavior. *EMBO J* 19: 2739-2750.
- Chan AH, Jenkins PA, Song YS 2012. Genome-wide fine-scale recombination rate variation in *Drosophila melanogaster*. *PLoS Genet* 8: e1003090. doi: 10.1371/journal.pgen.1003090
- Charlesworth B 2009. Fundamental concepts in genetics: effective population size and patterns of molecular evolution and variation. *Nat Rev Genet* 10: 195-205. doi: 10.1038/nrg2526



- Coop G, Przeworski M 2007. An evolutionary view of human recombination. *Nat Rev Genet* 8: 23-34. doi: 10.1038/nrg1947
- Danecek P, et al. 2011. The variant call format and VCFtools. *Bioinformatics* 27: 2156-2158. doi: 10.1093/bioinformatics/btr330
- Dapper AL, Payseur BA 2017. Effects of demographic history on the detection of recombination hotspots from linkage disequilibrium. *Mol Biol Evol* 35: 335-353. doi: 10.1093/molbev/msx272
- Davis L, Smith GR 2001. Meiotic recombination and chromosome segregation in *Schizosaccharomyces pombe*. *Proc Natl Acad Sci U S A* 98: 8395-8402.
- de Massy B 2013. Initiation of meiotic recombination: how and where? Conservation and specificities among eukaryotes. *Annu Rev Genet* 47: 563-599. doi: 10.1146/annurev-genet-110711-155423
- DeFaveri J, Merila J 2015. Temporal stability of genetic variability and differentiation in the three-spined stickleback (*Gasterosteus aculeatus*). *PLoS One* 10: e0123891. doi: 10.1371/journal.pone.0123891
- Delaneau O, et al. 2013. Haplotype estimation using sequencing reads. *Am J Hum Genet* 93: 687-696. doi: 10.1016/j.ajhg.2013.09.002
- Diagouraga B, et al. 2018. PRDM9 methyltransferase activity is essential for meiotic DNA double-strand break formation at its binding sites. *Mol Cell* 69: 853-865. doi: 10.1016/j.molcel.2018.01.033
- Drouaud J, et al. 2006. Variation in crossing-over rates across chromosome 4 of *Arabidopsis thaliana* reveals the presence of meiotic recombination "hot spots". *Genome Res* 16: 106-114. doi: 10.1101/gr.4319006
- Dumont BL, Payseur BA 2008. Evolution of the genomic rate of recombination in mammals. *Evolution* 62: 276-294. doi: 10.1111/j.1558-5646.2007.00278.x
- Dumont BL, Payseur BA 2011. Genetic analysis of genome-scale recombination rate evolution in house mice. *PLoS Genet* 7: e1002116. doi: 10.1371/
- Duret L, Arndt PF 2008. The impact of recombination on nucleotide substitutions in the human genome. *PLoS Genet* 4: e1000071. doi: 10.1371/
- Ferchaud A-L, Hansen MM 2016. The impact of selection, gene flow and demographic history on heterogeneous genomic divergence: three-spine sticklebacks in divergent environments. *Mol Ecol* 25: 238-259. doi: 10.1111/mec.13399
- Fledel-Alon A, et al. 2009. Broad-scale recombination patterns underlying proper disjunction in humans. *PLoS Genet* 5: e1000658. doi: 10.1371/journal.pgen.1000658
- Froenicke L, Anderson LK, Wienberg J, Ashley T 2002. Male mouse recombination maps for each autosome identified by chromosome painting. *Am J Hum Genet* 71: 1353-1368.
- Fryxell KJ, Moon W-J 2005. CpG mutation rates in the human genome are highly dependent on local GC content. *Mol Biol Evol* 22: 650-658. doi: 10.1093/molbev/msi043
- Glazer AM, et al. 2015. Genome assembly improvement and mapping convergently evolved skeletal traits in sticklebacks with genotyping-by-sequencing. *G3-Genes Genom Genet* 5: 1463-1472. doi: 10.1534/g3.115.017905
- Gow JL, Peichel CL, Taylor EB 2006. Contrasting hybridization rates between sympatric three-spined sticklebacks highlight the fragility of reproductive barriers between evolutionarily young species. *Mol Ecol* 15: 739-752. doi: 10.1111/j.1365-294X.2006.02825.x

- Grant CE, Bailey TL, Noble WS 2011. FIMO: scanning for occurrences of a given motif. *Bioinformatics* 27: 1017-1018. doi: 10.1093/bioinformatics/btr064
- Guillon H, de Massy B 2002. An initiation site for meiotic crossing-over and gene conversion in the mouse. *Nat Genet* 32: 296-299. doi: 10.1038/ng990
- Guo B, et al. 2015. Population genomic evidence for adaptive differentiation in Baltic Sea three-spined sticklebacks. *BMC Biol* 13: 19. doi: 10.1186/s12915-015-0130-8
- Hayashi K, Yoshida K, Matsui Y 2005. A histone H3 methyltransferase controls epigenetic events required for meiotic prophase. *Nature* 438: 374-378. doi: 10.1038/nature04112
- Hellsten U, et al. 2013. Fine-scale variation in meiotic recombination in *Mimulus* inferred from population shotgun sequencing. *PNAS* 110: 19478-19482. doi: 10.1073/pnas.1319032110
- Hinch AG, et al. 2014. Recombination in the human pseudoautosomal region PAR1. *PLoS Genet* 10: e1004503. doi: 10.1371/journal.pgen.1004503
- Hohenlohe PA, et al. 2010. Population genomics of parallel adaptation in threespine stickleback using sequenced RAD tags. *PLoS Genet* 6: e1000862. doi: 10.1371/journal.pgen.1000862
- Jeffreys AJ, Kauppi L, Neumann R 2001. Intensely punctate meiotic recombination in the class II region of the major histocompatibility complex. *Nat Genet* 29: 217-222.
- Jeffreys AJ, Murray J, Neumann R 1998. High-resolution mapping of crossovers in human sperm defines a minisatellite-associated recombination hotspot. *Mol Cell* 2: 267-273.
- Jeffreys AJ, et al. 2005. Human recombination hot spots hidden in regions of strong marker association. *Nat Genet* 37: 601-606. doi: 10.1038/ng1565
- Johnston HR, Cutler DJ 2012. Population demographic history can cause the appearance of recombination hotspots. *Am J Hum Genet* 90: 774-783. doi: 10.1016/j.ajhg.2012.03.011
- Jones FC, et al. 2012. The genomic basis of adaptive evolution in threespine sticklebacks. *Nature* 484: 55-61. doi: 10.1038/nature10944
- Kaback DB, Guacci V, Barber D, Mahon JW 1992. Chromosome size-dependent control of meiotic recombination. *Science* 256: 228-232.
- Kauppi L, Jasin M, Keeney S 2012. The tricky path to recombining X and Y chromosomes in meiosis. *Ann N Y Acad Sci* 1267: 18-23. doi: 10.1111/j.1749-6632.2012.06593.x
- Kawahara R, et al. 2009. Stickleback phylogenies resolved: evidence from mitochondrial genomes and 11 nuclear genes. *Mol Phylogenet Evol* 50: 401-444. doi: 10.1016/j.ympev.2008.10.014
- Kawakami T, et al. 2017. Whole-genome patterns of linkage disequilibrium across flycatcher populations clarify the causes and consequences of fine-scale recombination rate variation in birds. *Mol Ecol* 26: 4158-4172. doi: 10.1111/mec.14197
- Kent WJ 2002. BLAT - The BLAST-like alignment tool. *Genome Res* 12: 656-664. doi: 10.1101/Kitano J, Mori S, Peichel CL 2007. Phenotypic divergence and reproductive isolation between sympatric forms of Japanese threespine sticklebacks. *Biol J Linn Soc* 91: 671-685.
- Kon N, et al. 1997. Transcription factor Mts1/Mts2 (Atf1/Pcr1, Gad7/Pcr1) activates the M26 meiotic recombination hotspot in *Schizosaccharomyces pombe*. *Proc Natl Acad Sci U S A* 94: 13765-13770.
- Kong A, et al. 2002. A high-resolution recombination map of the human genome. *Nat Genet* 31: 241-247. doi: 10.1038/ng917

- Lam I, Keeney S 2015. Nonparadoxical evolutionary stability of the recombination initiation landscape in yeast. *Science* 350: 932-937.
- Langmead B, Salzberg SL 2012. Fast gapped-read alignment with Bowtie 2. *Nature Methods* 9: 357-359. doi: 10.1038/NMETH.1923
- Lee C-K, et al. 2004. Evidence for nucleosome depletion at active regulatory regions genome-wide. *Nat Genet* 36: 900-905. doi: 10.1038/ng1400
- Lesecque Y, Mouchiroud D, Duret L 2013. GC-biased gene conversion in yeast is specifically associated with crossovers: molecular mechanisms and evolutionary significance. *Mol Biol Evol* 30: 1409-1419. doi: 10.1093/molbev/mst056
- Li H, Durbin R 2011. Inference of human population history from individual whole-genome sequences. *Nature* 475: 493-496. doi: 10.1038/nature10231
- Li H, et al. 2009. The sequence alignment/map format and SAMtools. *Bioinformatics* 25: 2078-2079. doi: 10.1093/bioinformatics/btp352
- Liu S, Hansen MM 2017. PSMC (pairwise sequentially Markovian coalescent) analysis of RAD (restriction site associated DNA) sequencing data. *Mol Ecol Resour* 17: 631-641. doi: 10.1111/1755-0998.12606
- Liu S, Hansen MM, Jacobsen MW 2016. Region-wide and ecotype-specific differences in demographic histories of threespine stickleback populations, estimated from whole genome sequences. *Mol Ecol* 25: 5187-5202. doi: 10.1111/mec.13827
- Makinen HS, Cano JM, Merila J 2006. Genetic relationships among marine and freshwater populations of the European three-spined stickleback (*Gasterosteus aculeatus*) revealed by microsatellites. *Mol Ecol* 15: 1519-1534. doi: 10.1111/j.1365-294X.2006.02871.x
- Marais G 2003. Biased gene conversion: implications for genome and sex evolution. *Trends Genet* 19: 330-338. doi: 10.1016/s0168-9525(03)00116-1
- Marand AP, et al. 2017. Meiotic crossovers are associated with open chromatin and enriched with *Stowaway* transposons in potato. *Genome Biol* 18: 203. doi: 10.1186/s13059-017-1326-8
- Mather K 1936. The determination of position in crossing-over. *J Genet* 33: 207-235.
- McVean GAT, et al. 2004. The fine-scale structure of recombination rate variation in the human genome. *Science* 304: 581-584.
- Meunier J, Duret L 2004. Recombination drives the evolution of GC-content in the human genome. *Mol Biol Evol* 21: 984-990. doi: 10.1093/molbev/msh070
- Moen T, et al. 2008. A linkage map of the Atlantic salmon (*Salmo salar*) based on EST-derived SNP markers. *BMC Genomics* 9: 223. doi: 10.1186/1471-2164-9-223
- Morgan AP, et al. 2017. Structural variation shapes the landscape of recombination in mouse. *Genetics* 206: 603-619. doi: 10.1534/genetics.116.197988
- Mugal CF, Weber CC, Ellegren H 2015. GC-biased gene conversion links the recombination landscape and demography to genomic base composition: GC-biased gene conversion drives genomic base composition across a wide range of species. *Bioessays* 37: 1317-1326. doi: 10.1002/bies.201500058
- Myers S, et al. 2005. A fine-scale map of recombination rates and hotspots across the human genome. *Science* 310: 321-324.
- Myers S, et al. 2010. Drive against hotspot motifs in primates implicates the PRDM9 gene in meiotic recombination. *Science* 327: 876-879.

- Myers S, et al. 2008. A common sequence motif associated with recombination hot spots and genome instability in humans. *Nat Genet* 40: 1124-1129. doi: 10.1038/ng.213
- Myers S, et al. 2006. The distribution and causes of meiotic recombination in the human genome. *Biochem Soc T* 34: 526-530.
- Ohta K, Shibata T, Nicolas A 1994. Changes in chromatin structure at recombination initiation sites during yeast meiosis. *EMBO J* 13: 5754-5763.
- Oliver PL, et al. 2009. Accelerated evolution of the *Prdm9* speciation gene across diverse metazoan taxa. *PLoS Genet* 5: e1000753. doi: 10.1371/journal.pgen.1000753
- Orti G, Bell MA, Reimchen TE, Meyer A 1994. Global survey of mitochondrial DNA sequences in the threespine stickleback: evidence for recent migrations. *Evolution* 48: 608-622.
- Ostlund-Nilsson S, Mayer I, Huntingford FA. 2007. *The Biology of the Threespine Stickleback*. Boca Raton, FL: CRC Press.
- Otto SP, Lenormand T 2002. Resolving the paradox of sex and recombination. *Nat Rev Genet* 3: 252-261. doi: 10.1038/nrg761
- Otto SP, et al. 2011. About PAR: the distinct evolutionary dynamics of the pseudoautosomal region. *Trends Genet* 27: 358-367. doi: 10.1016/j.tig.2011.05.001
- Pan J, et al. 2011. A hierarchical combination of factors shapes the genome-wide topography of yeast meiotic recombination initiation. *Cell* 144: 719-731. doi: 10.1016/j.cell.2011.02.009
- Parvanov ED, Petkov PM, Paigen K 2010. *Prdm9* control activation of mammalian recombination hotspots. *Science* 327: 835.
- Peichel CL, et al. 2001. The genetic architecture of divergence between threespine stickleback species. *Nature* 414: 901-905.
- Peichel CL, et al. 2004. The master sex-determination locus in threespine sticklebacks is on a nascent Y chromosome. *Curr Biol* 14: 1416-1424. doi: 10.1016/j.cub.2004.08.030
- Persikov AV, Osada R, Singh M 2009. Predicting DNA recognition by Cys2His2 zinc finger proteins. *Bioinformatics* 25: 22-29. doi: 10.1093/bioinformatics/btn580
- Persikov AV, Singh M 2014. De novo prediction of DNA-binding specificities for Cys2His2 zinc finger proteins. *Nucleic Acids Res* 42: 97-108. doi: 10.1093/nar/gkt890
- Petes TD 2001. Meiotic Recombination Hotspots and Coldspots. *Nat Rev* 2: 360-369.
- Pfeifer B, Wittelsburger U, Ramos-Onsins SE, Lercher MJ 2014. PopGenome: An efficient Swiss army knife for population genomic analyses in R. *Mol Biol Evol* 31: 1929-1936. doi: 10.1093/molbev/msu136
- Pokholok DK, et al. 2005. Genome-wide map of nucleosome acetylation and methylation in yeast. *Cell* 122: 517-527.
- Powers NR, et al. 2016. The meiotic recombination activator PRDM9 trimethylates both H3K36 and H3K4 at recombination hotspots *in vivo*. *PLoS Genet* 12: e1006146. doi: 10.1371/journal.pgen.1006146
- Pratto F, et al. 2014. Recombination initiation maps of individual human genomes. *Science* 346: 1256442. doi: 10.1126/science.1256442
- Raj A, Stephens M, Pritchard JK 2014. fastSTRUCTURE: variational inference of population structure in large SNP data sets. *Genetics* 197: 573-589. doi: 10.1534/genetics.114.164350

- Ravinet M, et al. 2018. The genomic landscape at a late stage of stickleback speciation: High genomic divergence interspersed by small localized regions of introgression. *PLoS Genet* 14: e1007358. doi: 10.1371/journal.pgen.1007358
- Roesti M, Moser D, Berner D 2013. Recombination in the threespine stickleback genome-- patterns and consequences. *Mol Ecol* 22: 3014-3027. doi: 10.1111/mec.12322
- Sardell JM, et al. 2018. Sex differences in recombination in sticklebacks. *G3-Genes Genom Genet*. doi: 10.1534/g3.118.200166
- See DR, et al. 2006. Gene evolution at the ends of wheat chromosomes. *Proc Natl Acad Sci U S A* 103: 4162-4167.
- Serre D, Nadon R, Hudson TJ 2005. Large-scale recombination rate patterns are conserved among human populations. *Genome Res* 15: 1547-1552. doi: 10.1101/
- Singer A, et al. 2001. Sex-specific recombination rates in zebrafish (*Danio rerio*). *Genetics* 160: 649-657.
- Singhal S, et al. 2015. Stable recombination hotspots in birds. *Science* 350: 928-932.
- Smagulova F, et al. 2016. The evolutionary turnover of recombination hot spots contributes to speciation in mice. *Gene Dev* 30: 266-280. doi: 10.1101/gad.270009
- Smagulova F, et al. 2011. Genome-wide analysis reveals novel molecular features of mouse recombination hotspots. *Nature* 472: 375-378. doi: 10.1038/nature09869
- Smukowski Heil CS, Ellison C, Dubin M, Noor MAF 2015. Recombining without hotspots: a comprehensive evolutionary portrait of recombination in two closely related species of *Drosophila*. *Genome Biol Evol* 7: 2829-2842. doi: 10.1093/gbe/evv182
- Steiner WW, Schreckhise RW, Smith GR 2002. Meiotic DNA breaks at the *S.pombe* recombination hotspots *M26*. *Mol Cell* 9: 847-855.
- Stevison LS, et al. 2015. The time scale of recombination rate evolution in great apes. *Mol Biol Evol* 33: 928-945.
- Sueoka N 1962. On the genetic basis of variation and heterogeneity of DNA base composition. *Proc Natl Acad Sci U S A* 48: 582-592.
- Tajima F 1989. Statistical method for testing the neutral mutation hypothesis by DNA polymorphism. *Genetics* 123: 585-595.
- Tischfield SE, Keeney S 2012. Scale matters: the spatial correlation of yeast meiotic DNA breaks with histone H3 trimethylation is driven largely by independent colocalization at promoters. *Cell Cycle* 11: 1496-1503. doi: 10.4161/cc.19733
- Tsai IJ, Burt A, Koufopanou V 2010. Conservation of recombination hotspots in yeast. *Proc Natl Acad Sci U S A* 107: 7847-7852. doi: 10.1073/pnas.0908774107
- Van der Auwera GA, et al. 2013. From FastQ data to high confidence variant calls: the Genome Analysis Toolkit best practices pipeline. *Curr Protoc Bioinformatics* 43: 11.10.11-33. doi: 10.1002/0471250953.bi1110s43
- Wall JD, Stevison LS 2016. Detecting recombination hotspots from patterns of linkage disequilibrium. *G3-Genes Genom Genet* 6: 2265-2271. doi: 10.1534/g3.116.029587
- Weber CC, et al. 2014. Evidence for GC-biased gene conversion as a driver of between-lineage differences in avian base composition. *Genome Biol* 15: 549-565.
- Webster MT, Hurst LD 2012. Direct and indirect consequences of meiotic recombination: implications for genome evolution. *Trends Genet* 28: 101-109. doi: 10.1016/j.tig.2011.11.002

- White MA, Kitano J, Peichel CL 2015. Purifying selection maintains dosage-sensitive genes during degeneration of the threespine stickleback Y chromosome. *Mol Biol Evol* 32: 1981-1995. doi: 10.1093/molbev/msv078
- Wootton RJ. 1976. *The biology of the sticklebacks*: London ; New York : Academic Press.
- Wright AE, Dean R, Zimmer F, Mank JE 2016. How to make a sex chromosome. *Nat Commun* 7: 12087. doi: 10.1038/ncomms12087
- Yoshida K, et al. 2014. Sex chromosome turnover contributes to genomic divergence between incipient stickleback species. *PLoS Genet* 10: e1004223. doi: 10.1371/journal.pgen.1004223

Table 1. Mean equilibrium GC content ( $\pm$  SE)

|                                  | Lake Washington                      | Puget Sound                         |
|----------------------------------|--------------------------------------|-------------------------------------|
| Top 5% of Recombination Rates    | 0.432 ( $\pm 0.0006$ ) <sup>a</sup>  | 0.430 ( $\pm 0.0006$ ) <sup>a</sup> |
| Bottom 5% of Recombination Rates | 0.421 ( $\pm 0.0005$ ) <sup>b</sup>  | 0.415 ( $\pm 0.0005$ ) <sup>b</sup> |
| Population-Specific Hotspots     | 0.420 ( $\pm 0.002$ ) <sup>b</sup>   | 0.416 ( $\pm 0.001$ ) <sup>b</sup>  |
| Shared Hotspots                  | 0.422 ( $\pm 0.004$ ) <sup>a,b</sup> | 0.417 ( $\pm 0.004$ ) <sup>b</sup>  |

<sup>a,b</sup>Groups significantly different within populations by Wilcoxon Rank Test;  $p < 0.05$

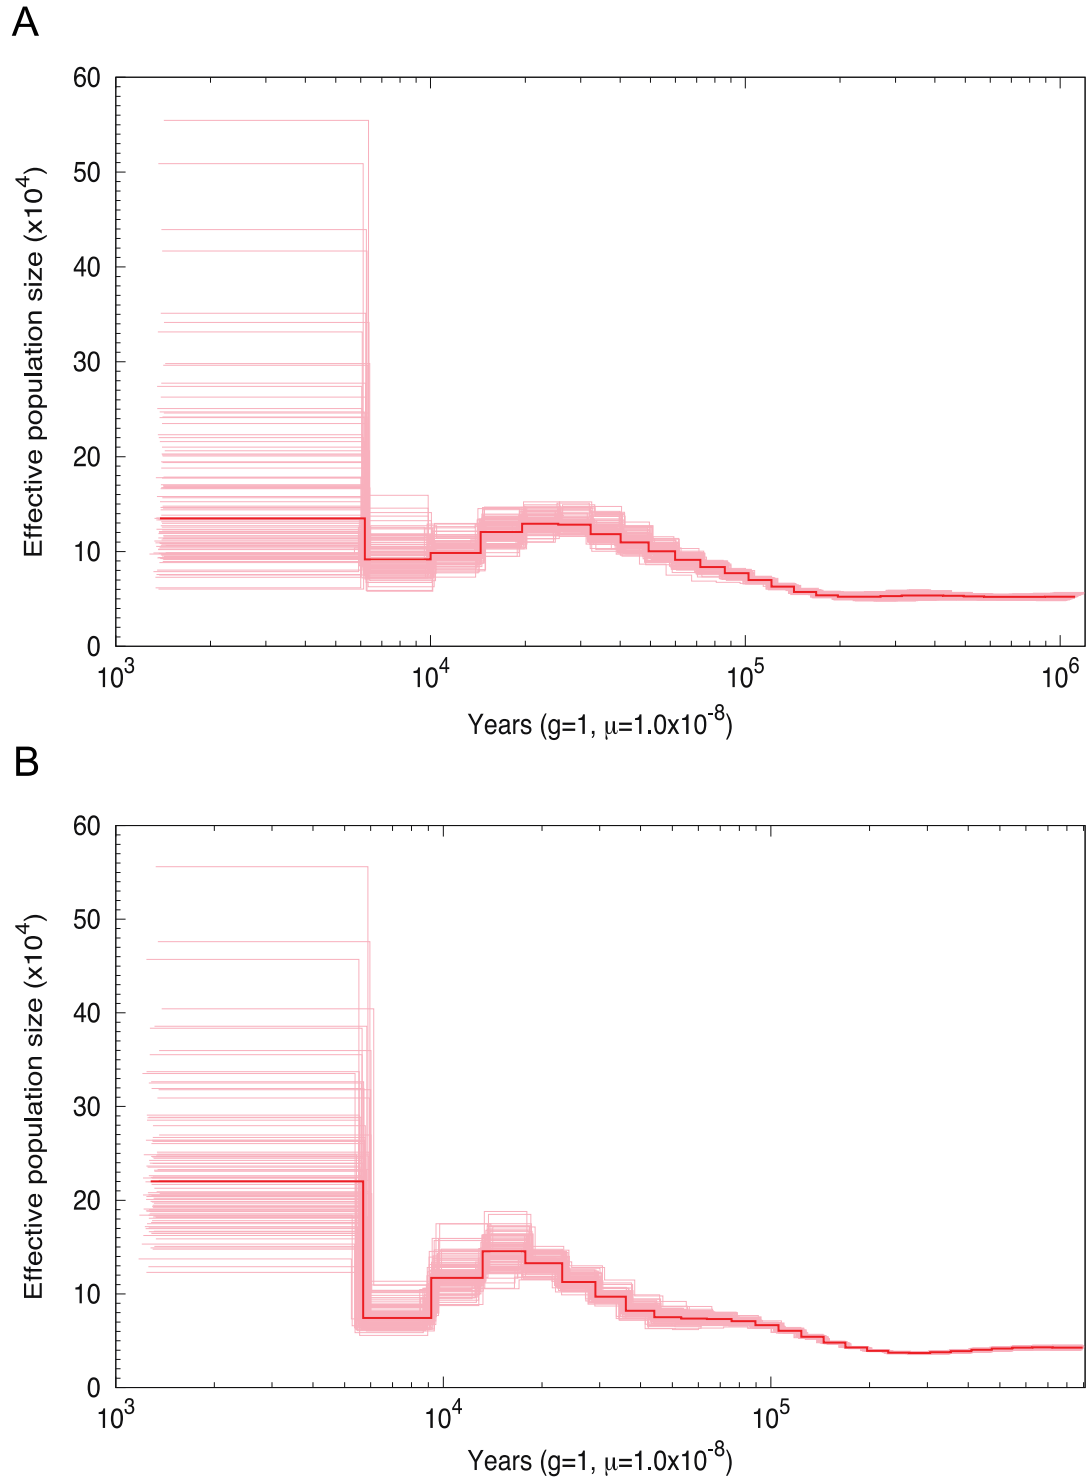

Figure 1. Lake Washington and Puget Sound have experienced past population bottlenecks. Demographic history for Lake Washington (A) and Puget Sound (B) was estimated using pairwise sequential Markov coalescent (PSMC) from a single female fish from each population. 100 bootstrap replicates around the estimated history are shown.



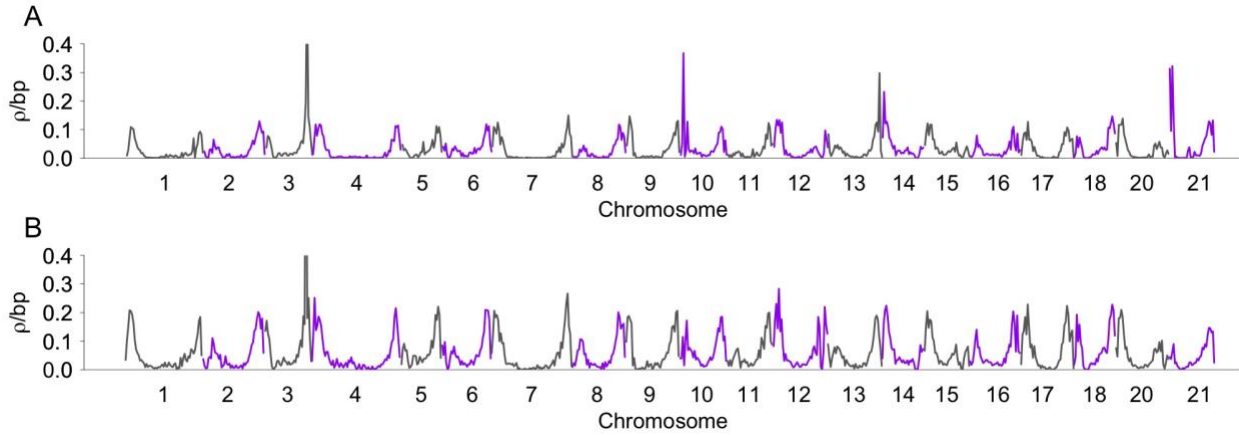

Figure 2. Recombination rates are similar at a broad scale in each population. Mean recombination rates were estimated using LDHelmet in non-overlapping 500 kb windows for each autosome in Lake Washington (A) and Puget Sound (B). Centromere positions are shown in Supplemental Figures 3 and 4. Transitions between gray and purple indicate different chromosomes.

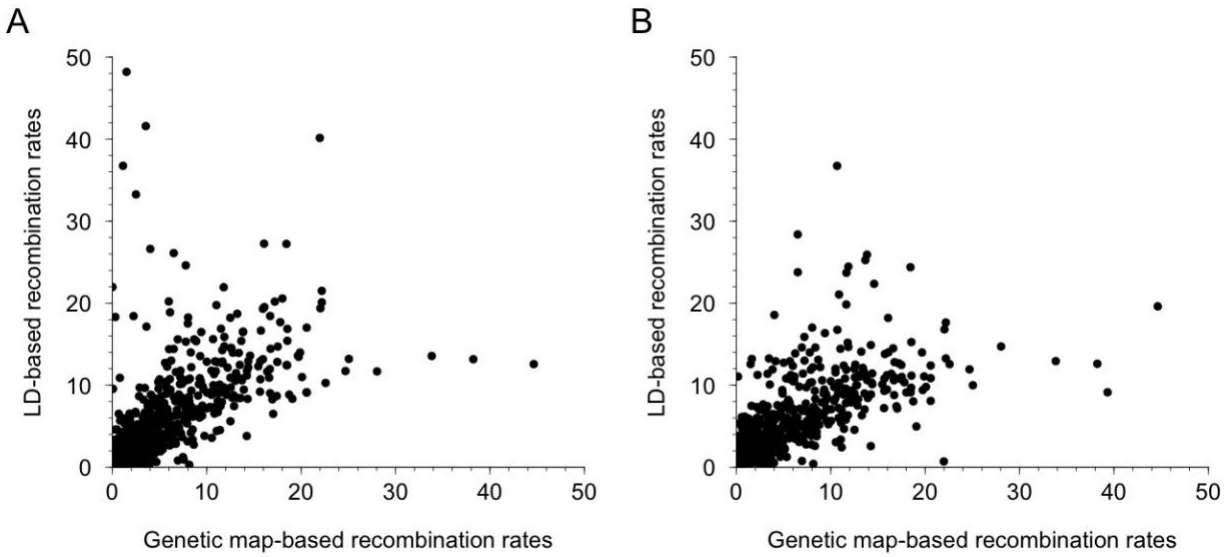

Figure 3. LD-based estimates of recombination rates are highly correlated with estimates from genetic linkage maps. Population-scaled recombination rates were converted to cM/Mb. There is a significant positive correlation in Lake Washington (Spearman's rank correlation;  $r = 0.830$ ;  $p < 0.001$ ) (A) and Puget Sound (Spearman's rank correlation;  $r = 0.810$ ;  $p < 0.001$ ) (B) between LD-based recombination rates and genetic map-based recombination rates.

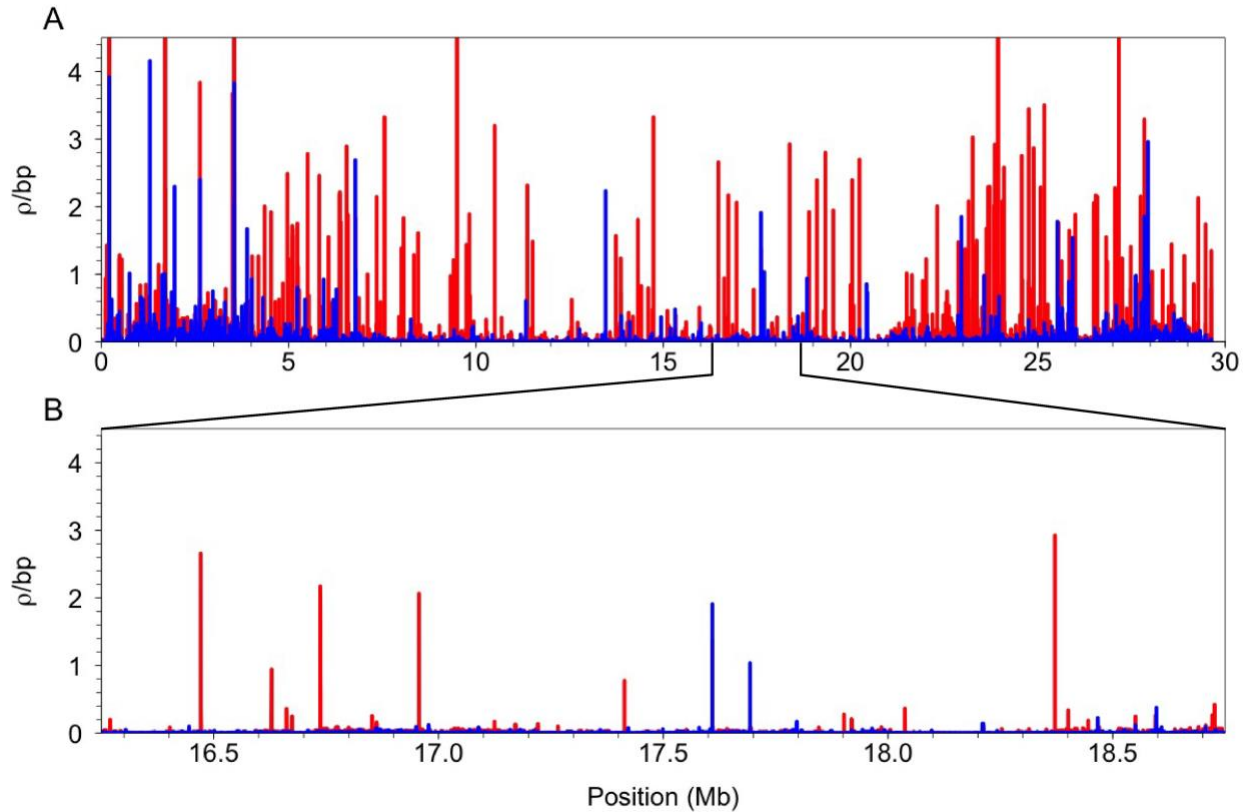

Figure 4. Recombination rates vary at a fine-scale across chromosome one. Population-scaled recombination rates across chromosome one are shown for Puget Sound (red) and Lake Washington (blue) (A). A subset of chromosome one is shown to highlight population-specific peaks of recombination across a narrow 2.5 Mb region (B). Only recombination rates below 4.5  $\rho/bp$  are shown. The remaining chromosome plots are in supplemental figures 3 and 4.

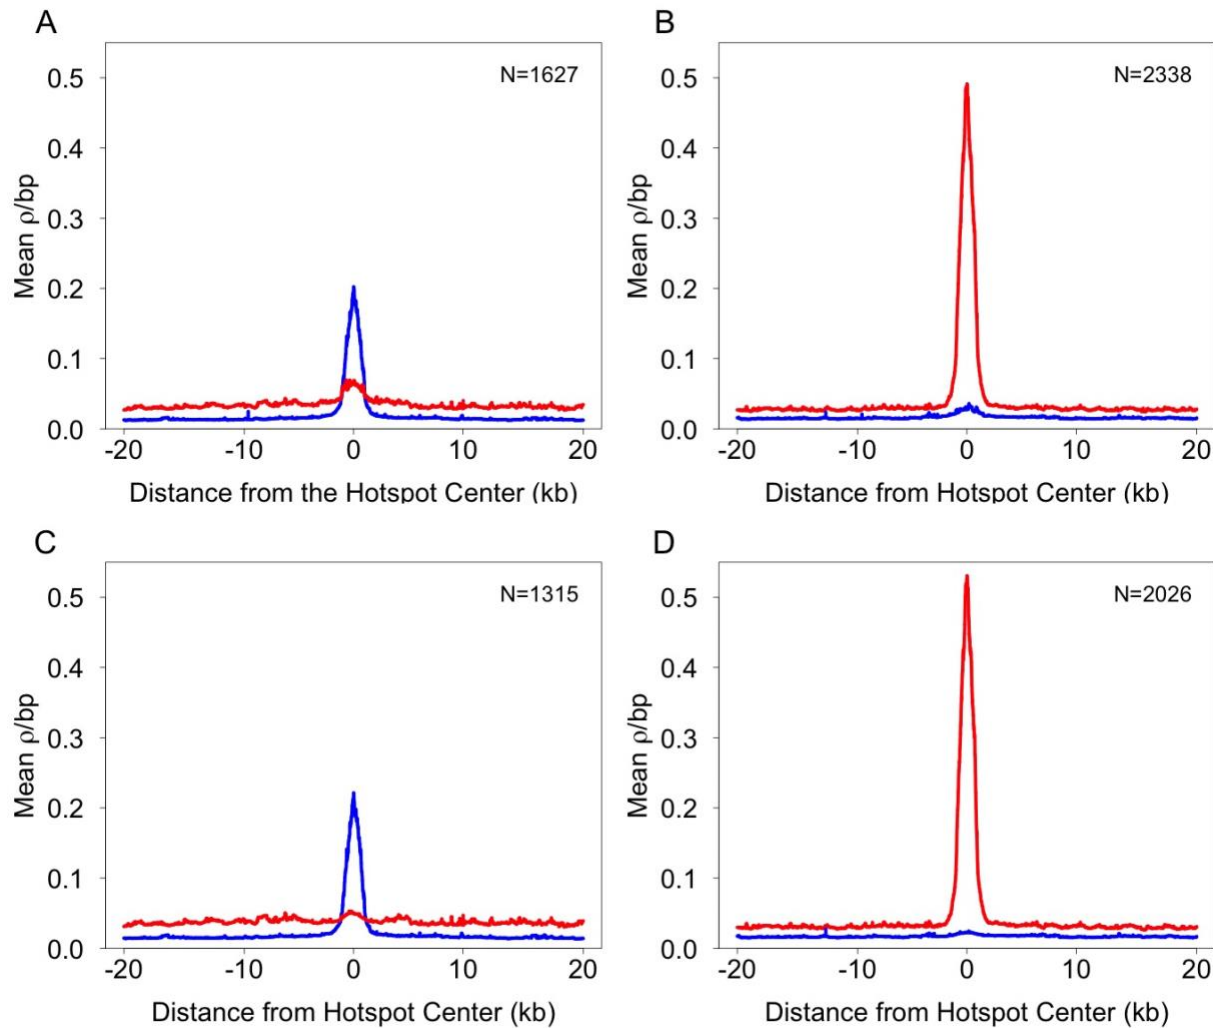

Figure 5. LD-based recombination rates around hotspots are population-specific. Mean recombination rates are shown across a 40 kb interval, flanking the center of hotspots. The mean recombination rate in shared and population-specific Lake Washington hotspots is higher in the Lake Washington population compared to the homologous regions in the Puget Sound population (A). The mean recombination rate in shared and population-specific Puget Sound hotspots are higher in the Puget Sound population compared to the homologous regions in the Lake Washington population (B). The pattern is more pronounced when shared hotspots are removed from the comparison, leaving only the population-specific hotspots (C and D). Puget Sound is shown in red and Lake Washington is shown in blue.

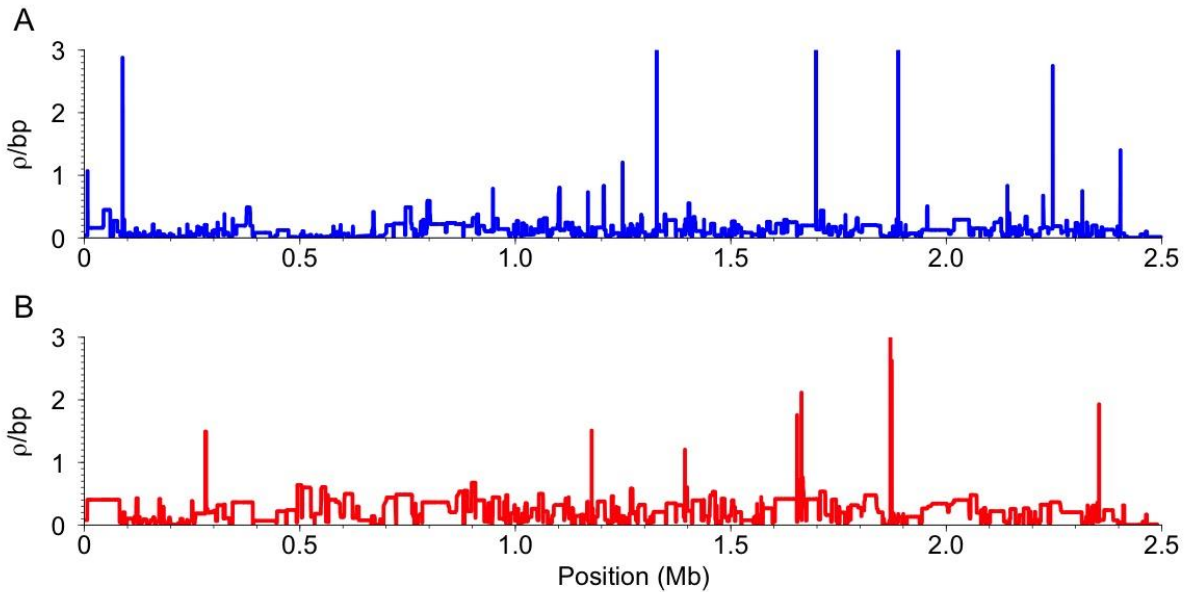

Figure 6. LD-based recombination rates are higher across the pseudoautosomal region (PAR). The PAR is the first ~2.5 Mb of linkage group 19. The Lake Washington (A) and Puget Sound (B) population-specific rates are shown separately. Overall, recombination rates are higher across the PAR than the autosomes (see Figure 4B) (Lake Washington PAR average: 0.129  $\rho$ /bp; Lake Washington autosome-wide average: 0.035  $\rho$ /bp; Puget Sound PAR average: 0.232  $\rho$ /bp; Puget Sound autosome-wide average: 0.072  $\rho$ /bp).
